# Supplementary material for: Synthesis, toxicity, biodegradability and physicochemical properties of 4-benzyl-4-methylmorpholinium-based ionic liquids
Source: Royal Society of Chemistry journal article supplement (doi:10.1039/c1gc15468k), 2011-01-01
Supplement: c1gc15468k.pdf [file c1gc15468k.pdf]

## SUPPLEMENTARY INFORMATION

### Synthesis, toxicity, biodegradability and physicochemical properties of 4-benzyl-4-methylmorpholinium-based ionic liquids

Juliusz Pernak,<sup>\*a</sup> Nina Borucka,<sup>a</sup> Filip Walkiewicz,<sup>a</sup> Bartosz Markiewicz,<sup>a</sup> Przemysław Fochtman,<sup>b</sup> Stefan Stolte,<sup>c</sup> Stephanie Steudte<sup>c</sup> and Piotr Stepnowski<sup>c</sup>

<sup>a</sup> Department of Chemical Technology, Poznan University of Technology, pl. M. Skłodowskiej-Curie 2, 60-965 Poznan, Poland. Tel: 0048 61 665 36 82; E-mail: juliusz.pernak@put.poznan.pl

<sup>b</sup> Institute of Industrial Organic Chemistry, Pszczyna Branch, ul. Doświadczalna 27, 43-200 Pszczyna, Poland. Fax: 0048 32 210 30 81 ext. 120; Tel: 0048 32 210 30 81 ext. 124; E-mail: fochtman@ipo-pszczyna.pl

<sup>c</sup> Department of Environmental Analysis, Faculty of Chemistry, University of Gdańsk, ul. Sobieskiego 18, 80-952 Gdańsk, Poland. Fax: 0048 58 523 55 72; Tel: 0048 58 523 54 48; E-mail: sox@chem.univ.gda.pl

#### Antimicrobial activity

The antimicrobial activity was determined by the tube dilution method<sup>1</sup>. The lowest concentration of compound at which there was no visible growth (turbidity) was taken as representing the MIC (minimum inhibitory concentration). The lowest concentration of compound supporting no colony formation was defined as the MBC for bacteria and MFC for fungi. The following microorganisms were used: *Micrococcus luteus* NCTC 7743, *Staphylococcus aureus* NCTC 4163, *Staphylococcus epidermidis* ATCC 49134, *Enterococcus faecium* ATCC 49474, *Moraxella catarrhalis* ATCC 25238, *Escherichia coli* ATCC 25922, *Serratia marcescens* ATCC 8100, *Proteus vulgaris* NCTC 4635, *Pseudomonas aeruginosa* NCTC 6749, *Bacillus subtilis* ATCC 6633, *Candida albicans* ATCC 10231, and *Rhodothorula rubra* (Demml 1889, Lodder 1934). Standard strains were supplied by the National Collection of Type Cultures (NCTC) London and the American Type Culture Collection (ATCC). *Rhodothorula rubra* was obtained from the Department of Pharmaceutical Bacteriology, University of Medical Sciences, Poznan.

Table S1 summarizes the results of the MIC, MBC and MFC for all the synthesized ionic liquids and a reference - benzalkonium chloride [BA][Cl].

---

<sup>1</sup> J. Feder-Kubis, M. Kubicki and J. Pernak, *Tetrahedron: Asymmetry*, 2010, 21, 2709.

**Table S1:** MIC, MBC and MFC values<sup>a</sup> for the morpholinium ILs, [BMmorf][Cl]<sup>b</sup> and [BA][Cl]<sup>c</sup>

| Strain                | ILs |       |       |       |       |       |       |       |       |       |       |       |       |       |       |       |       | [BMmorf]          | [BA]              |       |     |
|-----------------------|-----|-------|-------|-------|-------|-------|-------|-------|-------|-------|-------|-------|-------|-------|-------|-------|-------|-------------------|-------------------|-------|-----|
|                       | 1   | 2     | 3     | 4     | 5     | 6     | 7     | 8     | 9     | 10    | 11    | 12    | 13    | 14    | 15    | 16    | 17    | [Cl] <sup>b</sup> | [Cl] <sup>c</sup> |       |     |
| <i>M. luteus</i>      | MIC | > 500 | > 500 | > 500 | > 500 | > 500 | > 500 | > 500 | > 500 | > 500 | 250   | > 500 | 500   | > 500 | > 500 | > 500 | > 500 | > 500             | > 500             | 0.5   |     |
|                       | MBC | > 500 | > 500 | > 500 | > 500 | > 500 | > 500 | > 500 | > 500 | > 500 | 250   | > 500 | 500   | > 500 | > 500 | > 500 | > 500 | > 500             | > 500             | > 500 | 4   |
| <i>S. aureus</i>      | MIC | > 500 | > 500 | > 500 | > 500 | > 500 | > 500 | > 500 | > 500 | > 500 | 125   | > 500 | 250   | > 500 | > 500 | > 500 | > 500 | > 500             | > 500             | > 500 | 1   |
|                       | MBC | > 500 | > 500 | > 500 | > 500 | > 500 | > 500 | > 500 | > 500 | > 500 | 125   | > 500 | 500   | > 500 | > 500 | > 500 | > 500 | > 500             | > 500             | > 500 | 8   |
| <i>S. epidermidis</i> | MIC | > 500 | > 500 | > 500 | > 500 | > 500 | > 500 | > 500 | > 500 | > 500 | 125   | > 500 | 250   | > 500 | > 500 | > 500 | > 500 | > 500             | > 500             | > 500 | 0.5 |
|                       | MBC | > 500 | > 500 | > 500 | > 500 | > 500 | > 500 | > 500 | > 500 | > 500 | > 500 | > 500 | 500   | > 500 | > 500 | > 500 | > 500 | > 500             | > 500             | > 500 | 2   |
| <i>E. faecium</i>     | MIC | > 500 | > 500 | > 500 | 500   | 500   | 250   | 250   | 250   | 250   | 250   | 500   | 250   | > 500 | > 500 | > 500 | > 500 | > 500             | > 500             | > 500 | 2   |
|                       | MBC | > 500 | > 500 | > 500 | > 500 | > 500 | > 500 | > 500 | > 500 | > 500 | 500   | > 500 | 250   | > 500 | > 500 | > 500 | > 500 | > 500             | > 500             | > 500 | 8   |
| <i>M. catarrhalis</i> | MIC | > 500 | > 500 | > 500 | 250   | 250   | 250   | 250   | 250   | 62    | 250   | 250   | > 500 | > 500 | > 500 | > 500 | > 500 | 250               | 250               | 0.2   |     |
|                       | MBC | > 500 | > 500 | > 500 | 500   | 500   | 250   | 250   | 250   | 125   | 500   | 250   | > 500 | > 500 | > 500 | > 500 | > 500 | 250               | 250               | 0.5   |     |
| <i>E. coli</i>        | MIC | > 500 | > 500 | > 500 | > 500 | > 500 | > 500 | > 500 | > 500 | > 500 | 125   | > 500 | 250   | > 500 | > 500 | > 500 | > 500 | 250               | 250               | 1     |     |
|                       | MBC | > 500 | > 500 | > 500 | > 500 | > 500 | > 500 | > 500 | > 500 | > 500 | 125   | > 500 | 500   | > 500 | > 500 | > 500 | > 500 | > 500             | > 500             | > 500 | 1   |
| <i>S. marcescens</i>  | MIC | > 500 | > 500 | > 500 | > 500 | > 500 | > 500 | > 500 | > 500 | > 500 | > 500 | > 500 | > 500 | > 500 | > 500 | > 500 | > 500 | > 500             | > 500             | 62    |     |
|                       | MBC | > 500 | > 500 | > 500 | > 500 | > 500 | > 500 | > 500 | > 500 | > 500 | > 500 | > 500 | > 500 | > 500 | > 500 | > 500 | > 500 | > 500             | > 500             | > 500 | 62  |
| <i>P. vulgaris</i>    | MIC | > 500 | > 500 | > 500 | > 500 | > 500 | > 500 | > 500 | > 500 | > 500 | 500   | > 500 | 250   | > 500 | > 500 | > 500 | > 500 | > 500             | > 500             | > 500 | 31  |
|                       | MBC | > 500 | > 500 | > 500 | > 500 | > 500 | > 500 | > 500 | > 500 | > 500 | > 500 | > 500 | > 500 | > 500 | > 500 | > 500 | > 500 | > 500             | > 500             | > 500 | 31  |
| <i>P. aeruginosa</i>  | MIC | > 500 | > 500 | > 500 | > 500 | > 500 | > 500 | > 500 | > 500 | > 500 | > 500 | > 500 | > 500 | > 500 | > 500 | > 500 | > 500 | > 500             | > 500             | > 500 | 62  |
|                       | MBC | > 500 | > 500 | > 500 | > 500 | > 500 | > 500 | > 500 | > 500 | > 500 | > 500 | > 500 | > 500 | > 500 | > 500 | > 500 | > 500 | > 500             | > 500             | > 500 | 62  |
| <i>B. subtilis</i>    | MIC | > 500 | > 500 | > 500 | 500   | 500   | 250   | 250   | 250   | 250   | 125   | 500   | 250   | > 500 | > 500 | > 500 | > 500 | 250               | 250               | 1     |     |
|                       | MBC | > 500 | > 500 | > 500 | 500   | 500   | 250   | 250   | 250   | 250   | 125   | 500   | 250   | > 500 | > 500 | > 500 | > 500 | 250               | 250               | 1     |     |
| <i>C. albicans</i>    | MIC | > 500 | > 500 | > 500 | > 500 | > 500 | > 500 | > 500 | > 500 | > 500 | > 500 | > 500 | > 500 | > 500 | > 500 | > 500 | > 500 | > 500             | > 500             | 4     |     |
|                       | MFC | > 500 | > 500 | > 500 | > 500 | > 500 | > 500 | > 500 | > 500 | > 500 | > 500 | > 500 | > 500 | > 500 | > 500 | > 500 | > 500 | > 500             | > 500             | > 500 | 31  |
| <i>R. rubra</i>       | MIC | > 500 | > 500 | > 500 | > 500 | > 500 | > 500 | > 500 | > 500 | > 500 | 250   | > 500 | 500   | > 500 | > 500 | > 500 | > 500 | > 500             | > 500             | 8     |     |
|                       | MFC | > 500 | > 500 | > 500 | > 500 | > 500 | > 500 | > 500 | > 500 | > 500 | 500   | > 500 | > 500 | > 500 | > 500 | > 500 | > 500 | > 500             | > 500             | > 500 | 31  |

<sup>a</sup> in ppm; <sup>b</sup> 4-benzyl-4methylmorpholinium chloride; <sup>c</sup> benzalkonium chloride<sup>2</sup>

<sup>2</sup> J. Cybulski, A. Wiśniewska, A. Kulig-Adamiak, Z. Dąbrowski, T. Praczyk, A. Michalczyk, F. Walkiewicz, K. Materna, J. Pernak, *Tetrahedron Letters*, **2011**, 52, 1325.
